# Supplementary material
Source: PubMed Central journal article supplement (PMC3498925)
Supplement: ismej201214x1.pdf [file ismej201214x1.pdf]

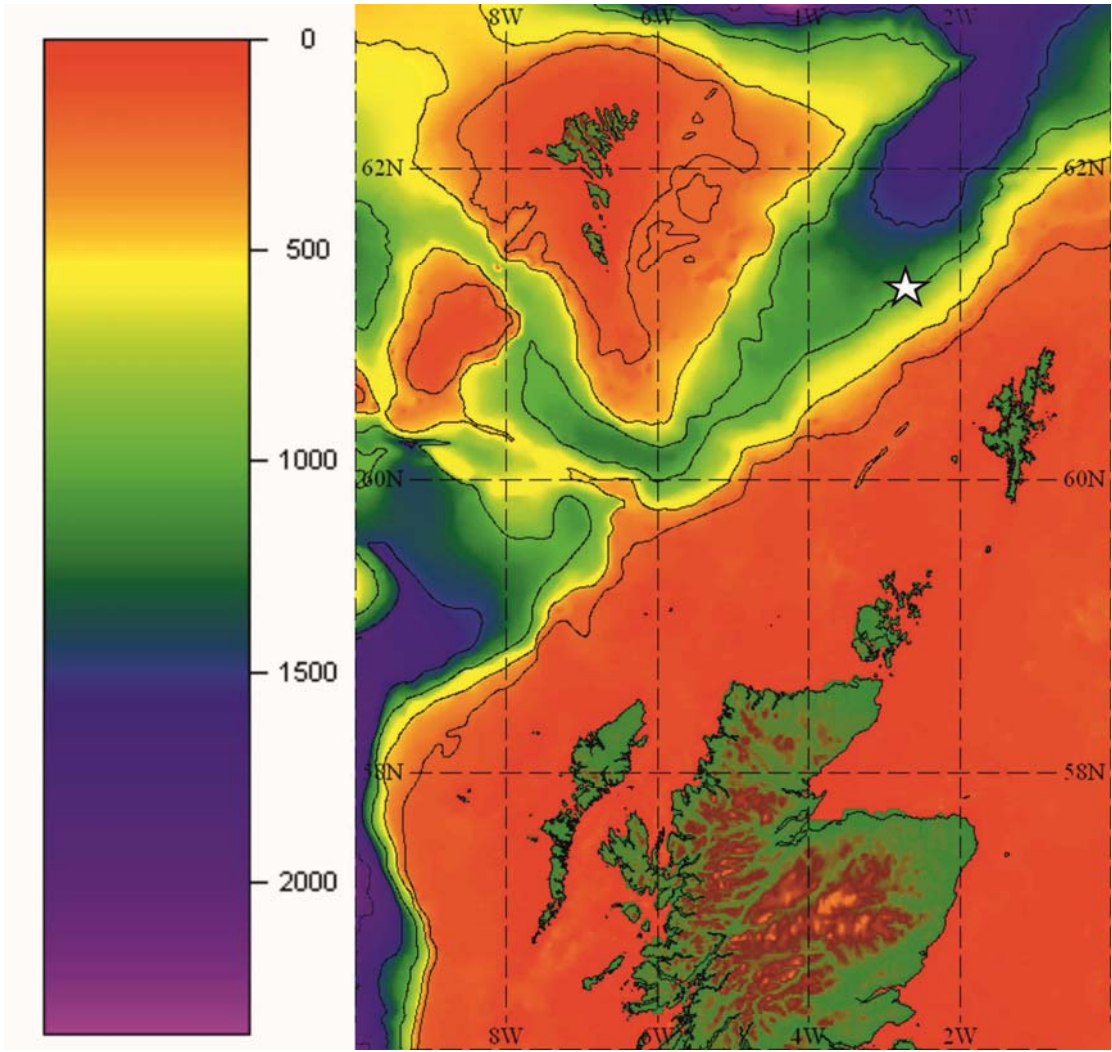

**Figure S1.** Map illustrating the location of the sampling site (white star) in the Faroe Shetland Channel, Northeast Atlantic. Inset legend denotes water depth in metres.
