# Supplementary material
Source: PubMed Central journal article supplement (PMC3498925)
Supplement: ismej201214x2.pdf [file ismej201214x2.pdf]

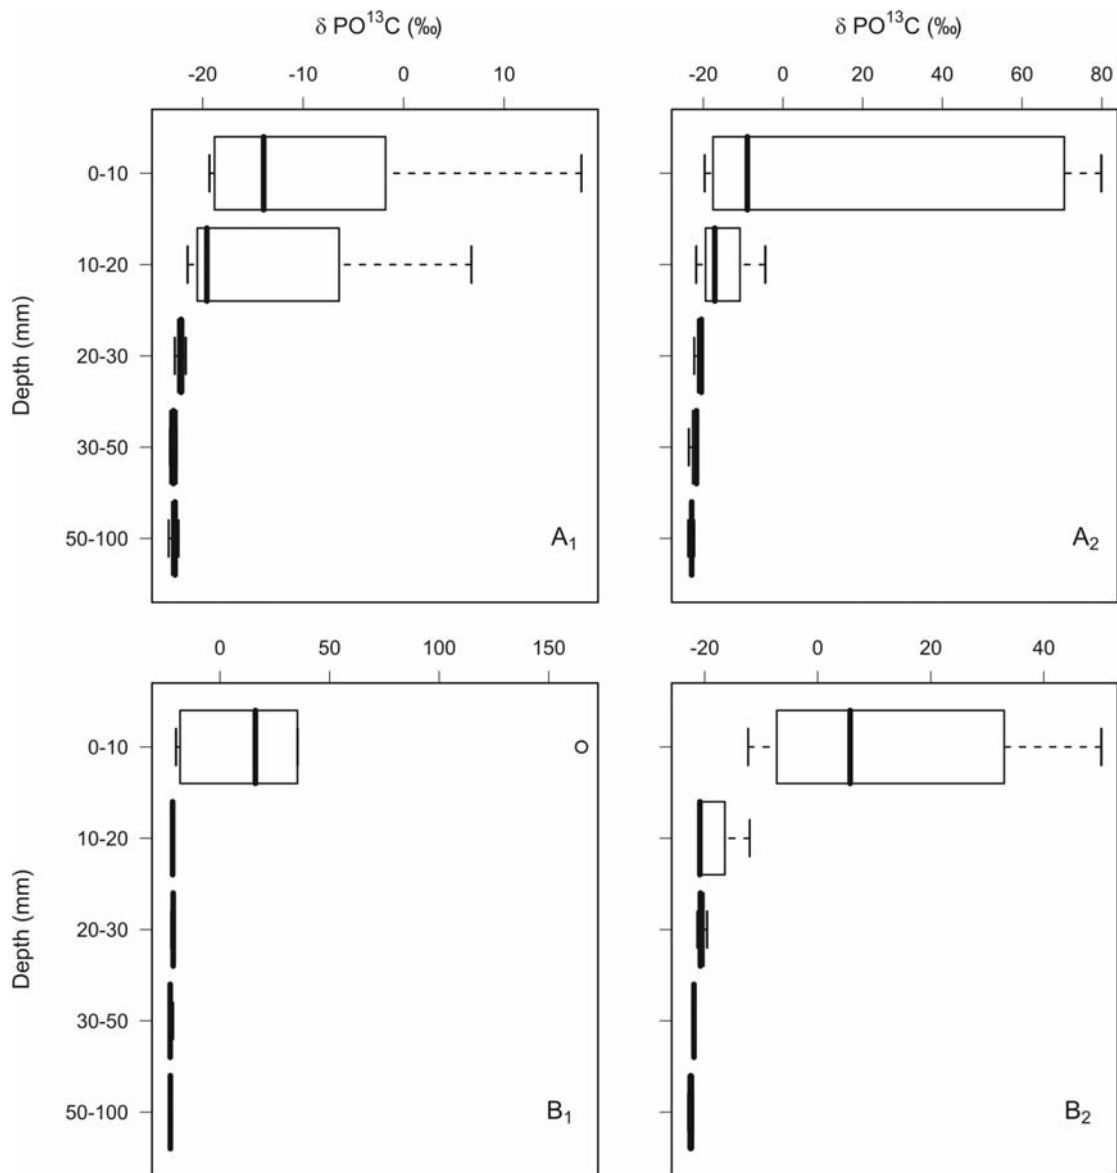

**Figure S2.** Boxplots illustrating the vertical penetration of the organic <sup>13</sup>C tracer during experiments in May (A) and October (B) in the faecal pellet (1) and diatom (2) treatments.
