# Supplementary material
Source: PubMed Central journal article supplement (PMC3498925)
Supplement: ismej201214x3.pdf [file ismej201214x3.pdf]

**A**

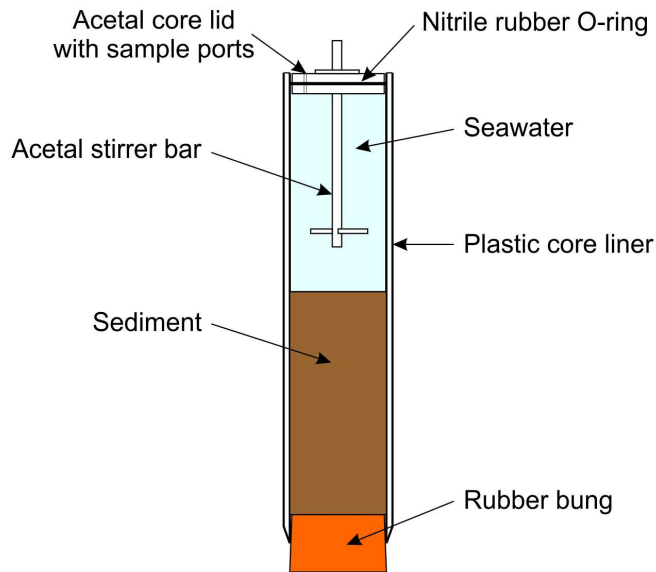

**B**

**n = 18**

Sediment cores from 1080m transferred to incubator (-0.7°C) and acclimatised overnight

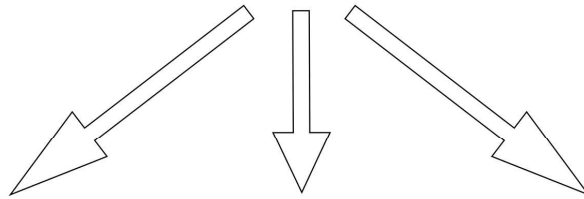

Introduce substrates onto sediment surface and seal with lids;  
Sample for O<sub>2</sub> and DIC analyses at t = 0, 1, 2, 3, 4, 5, 6 days

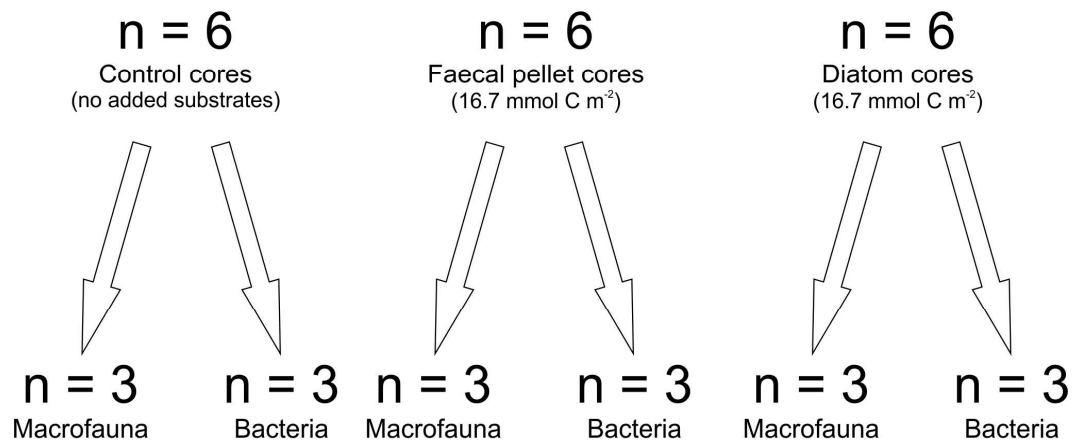

Slice the cores into horizontal sections;  
Determine biomass and carbon uptake in upper 2cm

**Figure S3.** Schematic (not to scale) illustrating the experimental setup (A) and sampling procedure (B).
