# Supplementary material
Source: PubMed Central journal article supplement (PMC3498925)
Supplement: ismej201214x4.pdf [file ismej201214x4.pdf]

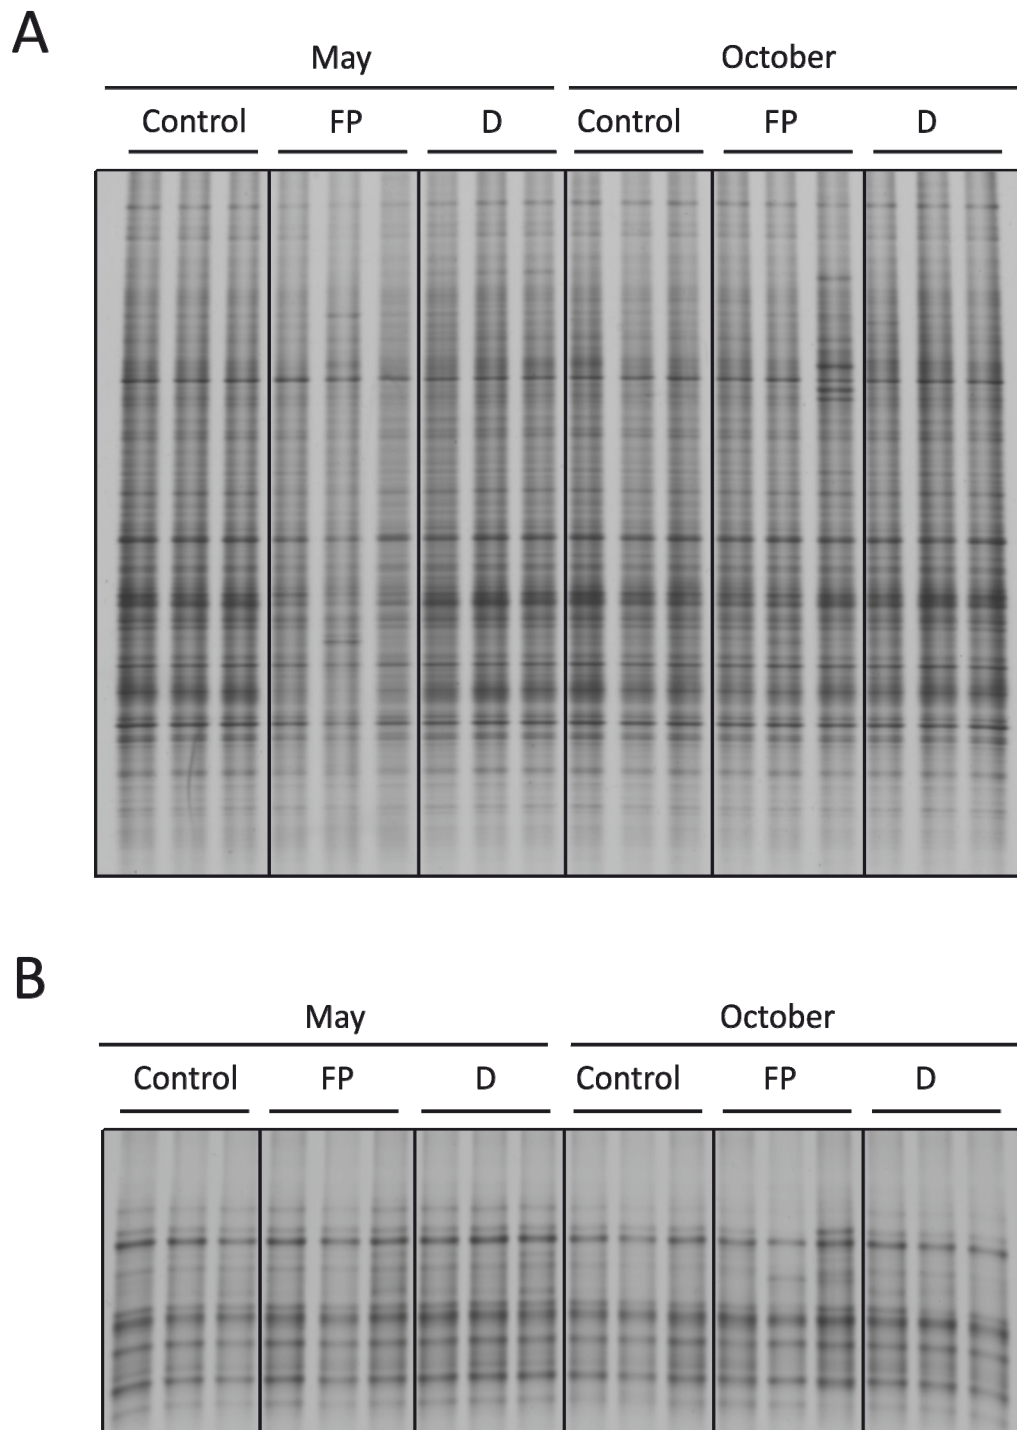

**Figure S4.** DGGE analysis of bacterial (A) and archaeal (B) community structures in the upper 1 cm of sediment from the control, faecal pellet (FP) and diatom (D) treatments in May and October. Each vertical track represents a replicate sediment core ( $n = 3$  in all cases).
