# Supplementary material
Source: PubMed Central journal article supplement (PMC3498925)
Supplement: ismej201214x5.pdf [file ismej201214x5.pdf]

**Table S1.** Model output for the carbon mineralization analysis. The optimal model (OM) was a LME model that incorporated Core Identity as a random effect (L. ratio = 10.709,  $df_1$ ,  $p_{corr} = 0.001$ ) and allowed the residual spread to increase exponentially over Time and to vary by Treatment (L. ratio = 123.925,  $df_2$ ,  $p < 0.001$ ):

$$Carbon_{ij} = Intercept + Time_{ij} + Treatment_{ij} + Month_{ij} + Time_{ij} \times Treatment_{ij} + Treatment_{ij} \times Month_{ij} + a_i + \varepsilon_{ij}$$

$$a_i \sim N(0, \sigma_{Core}^2)$$

$$\varepsilon_{ij} \sim N(0, \sigma_k^2 \times e^{2\delta \times Time_{ij}})$$

where  $a_i$  is a random intercept and the index  $i$  refers to the core identity ( $i = 1, \dots, 18$ ),  $j$  to the observations within each core ( $j = 1, \dots, 6$ ) and  $k$  to the treatment ( $k = 1, \dots, 2$ ). Random effect (a), variance function (b), correlation coefficients of observations made within each variance grouping (intra-class correlation) and fixed effects (d). \* Note the intercept (baseline) is the faecal pellet treatment in May.

| (a) Model term | $\sigma$ |
|----------------|----------|
| Core ID        | 0.031    |

  

| (b) Variance term | Variance estimates                                                  |
|-------------------|---------------------------------------------------------------------|
| $\delta$          | 0.300                                                               |
| Faecal pellet     | $0.016^2 \times e^{2 \times 0.300 \times Time_{ij}}$                |
| Diatom            | $(0.016 \times 4.130)^2 \times e^{2 \times 0.300 \times Time_{ij}}$ |

| <b>Intra-class correlation</b> |      |       |        |
|--------------------------------|------|-------|--------|
| (c)                            | Time | FP    | Diatom |
|                                | 1    | 0.526 | 0.061  |
|                                | 2    | 0.250 | 0.019  |
|                                | 3    | 0.091 | 0.006  |
|                                | 4    | 0.029 | 0.002  |
|                                | 5    | 0.009 | 0.001  |

| (d) | Model term              | Value $\pm$ SE      | df  | t      | p      |
|-----|-------------------------|---------------------|-----|--------|--------|
|     | Intercept*              | -0.035 $\pm$ 0.015  | 117 | -2.250 | 0.027  |
|     | Time                    | 0.053 $\pm$ 0.003   | 117 | 16.205 | <0.001 |
|     | Diatom                  | -0.175 $\pm$ 0.043  | 20  | -4.136 | <0.001 |
|     | October                 | <-0.001 $\pm$ 0.010 | 20  | -0.013 | 0.990  |
|     | Time $\times$ Diatom    | 0.138 $\pm$ 0.014   | 117 | 9.795  | <0.001 |
|     | Diatom $\times$ October | 0.138 $\pm$ 0.044   | 20  | 3.153  | 0.005  |
