# Supplementary material
Source: PubMed Central journal article supplement (PMC3498925)
Supplement: ismej201214x6.pdf [file ismej201214x6.pdf]

**Table S2.** Model output for oxygen consumption analysis. The OM was a LME model that incorporated Core Identity as a random effect (L. ratio = 30.099,  $df_1$ ,  $p_{corr} < 0.001$ ) and allowed the residual spread to vary as an interactive function of Treatment  $\times$  Month (L. ratio = 58.330,  $df_5$ ,  $p < 0.001$ ):

$$Oxygen_{ij} = Intercept + Time_{ij} + Month_{ij} + Time_{ij} \times Month_{ij} + a_i + \varepsilon_{ij}$$

$$a_i \sim N(0, \sigma_{Core}^2)$$

$$\varepsilon_{ij} \sim N(0, \sigma_{kl}^2)$$

where  $a_i$  is a random intercept and the index  $i$  refers to cores ( $i = 1, \dots, 18$ ),  $j$  to the observations within each core ( $j = 1, \dots, 5$ ),  $k$  to the treatment ( $k = 1, \dots, 2$ ) and  $l$  to the Month ( $l = 1, \dots, 2$ ). Model output for oxygen analysis: Random effect (a), variance function (b), correlation coefficients of observations made within each variance grouping (intra-class correlation) (c) and fixed effects (d). FP = faecal pellet. \*Note the intercept (baseline) is the control treatment in May.

| (a) | <b>Model term</b> | <b><math>\sigma</math></b> |
|-----|-------------------|----------------------------|
|     | Core ID           | 1.743                      |

  

| (b) | <b>Variance term</b> | <b>Variance estimates</b> |
|-----|----------------------|---------------------------|
|     | Ctrl×May             | 8.060                     |
|     | FP×May               | 7.963                     |
|     | Diatom×May           | 15.461                    |
|     | Ctrl×October         | 3.586                     |
|     | FP×October           | 2.573                     |
|     | Diatom×October       | 1.803                     |

| (c) | <b>Model term</b> | <b>Intra-class correlation</b> |
|-----|-------------------|--------------------------------|
|     | Ctrl×May          | 0.274                          |
|     | FP×May            | 0.276                          |
|     | Diatom×May        | 0.164                          |
|     | Ctrl×October      | 0.459                          |
|     | FP×October        | 0.541                          |
|     | Diatom×October    | 0.628                          |

| (d) | <b>Model term</b> | <b>Value ± SE</b> | <b>df</b> | <b>t</b> | <b>p</b> |
|-----|-------------------|-------------------|-----------|----------|----------|
|     | Intercept*        | 80.549 ± 0.648    | 211       | 124.306  | <0.001   |
|     | Time              | -1.983 ± 0.138    | 211       | -14.401  | <0.001   |
|     | October           | -12.226 ± 0.809   | 34        | -15.122  | <0.001   |
|     | Time×October      | 0.389 ± 0.155     | 211       | 2.506    | 0.013    |
