# Supplementary material
Source: PubMed Central journal article supplement (PMC3498925)
Supplement: ismej201214x7.pdf [file ismej201214x7.pdf]

**Table S3.** Quantities of substrate-derived carbon incorporated into individual PLFAs in the upper 2 cm of sediment over the 6-day experimental duration ( $\text{nmol C m}^{-2} \text{exp}^{-1} \pm \text{SEM}$ ) during May and October. Values are net and expressed for the 6-day experimental duration to avoid the assumption that rates are linear.

|                  | May               |                   | October           |                   |
|------------------|-------------------|-------------------|-------------------|-------------------|
|                  | Faeces            | Diatom            | Faeces            | Diatom            |
| i15:0            | $0.050 \pm 0.027$ | $0.076 \pm 0.012$ | $0.087 \pm 0.002$ | $0.055 \pm 0.001$ |
| a15:0            | $0.033 \pm 0.019$ | $0.061 \pm 0.018$ | $0.053 \pm 0.002$ | $0.036 \pm 0.002$ |
| 15:0             | $0.027 \pm 0.015$ | $0.058 \pm 0.011$ | $0.054 \pm 0.007$ | $0.038 \pm 0.001$ |
| i16:0            | $0.028 \pm 0.015$ | $0.030 \pm 0.005$ | $0.051 \pm 0.003$ | $0.021 \pm 0.001$ |
| a17:0            | $0.012 \pm 0.006$ | $0.031 \pm 0.005$ | $0.022 \pm 0.003$ | $0.014 \pm 0.001$ |
| PLFA 12-Me-16:0  | $0.007 \pm 0.004$ | $0.003 \pm 0.002$ | $0.013 \pm 0.004$ | $0.002 \pm 0.001$ |
| 17:1 $\omega$ 8c | $0.007 \pm 0.004$ | $0.016 \pm 0.003$ | $0.016 \pm 0.002$ | $0.012 \pm 0.001$ |
| 17:0cy           | $0.005 \pm 0.002$ | $0.014 \pm 0.000$ | $0.024 \pm 0.004$ | $0.010 \pm 0.001$ |
| 17:0             | $0.006 \pm 0.005$ | $0.011 \pm 0.000$ | $0.013 \pm 0.002$ | $0.007 \pm 0.001$ |
| 19:1 $\omega$ 8  | $0.014 \pm 0.007$ | $0.011 \pm 0.001$ | $0.007 \pm 0.006$ | $0.006 \pm 0.001$ |
| 19:0cy           | $0.006 \pm 0.003$ | $0.010 \pm 0.001$ | $0.009 \pm 0.003$ | $0.005 \pm 0.000$ |
