# Supplementary material
Source: PubMed Central journal article supplement (PMC3498925)
Supplement: ismej201214x8.pdf [file ismej201214x8.pdf]

**Table S4:** PerMANOVA results for tests examining Treatment and Month effects on  $^{13}\text{C}$  uptake into sediment phospholipid fatty acids (PLFA) and the relative compositions of the bacterial and archaeal communities.

|                          | PLFA  |       | Bacteria |       | Archaea |       |
|--------------------------|-------|-------|----------|-------|---------|-------|
|                          | F     | p     | F        | p     | F       | p     |
| Treatment                | 0.729 | 0.413 | 0.612    | 0.846 | 0.610   | 0.693 |
| Month                    | 0.682 | 0.132 | 1.845    | 0.899 | 5.780   | 0.618 |
| Treatment $\times$ Month | 4.596 | 0.061 | 0.607    | 0.851 | 0.873   | 0.482 |
